# Supplementary material for: Characterization of the Inflammatory Response to Severe COVID-19 Illness
Source: PubMed Central journal article supplement — Am J Respir Crit Care Med. 2020 Sep 15;202(6):812–21. doi: 10.1164/rccm.202005-1583OC (PMC7491404; doi:10.1164/rccm.202005-1583oc), 2020-09-15
Supplement: rccm.202005-1583OC_mcelvaney_data_supplement.pdf [file rccm.202005-1583OC_mcelvaney_data_supplement.pdf]

## **Characterization of the Inflammatory Response to Severe COVID-19 Illness**

*Oliver J McElvaney, Natalie L McEvoy , Oisín F McElvaney , Tomás P Carroll, Mark P Murphy,  
Danielle M Dunlea, Orna Ní Choileáin, Jennifer Clarke, Eoin O'Connor, Grace Hogan,  
Daniel Ryan, Imran Sulaiman, Cedric Gunaratnam, Peter Branagan, Michael E O'Brien,  
Ross K Morgan, Richard W Costello, Killian Hurley, Seán Walsh, Eoghan de Barra,  
Cora McNally, Samuel McConkey, Fiona Boland, Sinead Galvin, Fiona Kiernan,  
James O'Rourke, Rory Dwyer, Michael Power, Pierce Geoghegan, Caroline Larkin,  
Ruth Aoibheann O'Leary, James Freeman, Alan Gaffney, Brian Marsh, Gerard F Curley,  
and Noel G McElvaney*

ONLINE DATA SUPPLEMENT

## **Legends:**

### **Figure E1. IL-1 $\beta$ :IL-10 ratio is increased in severe COVID-19 illness.**

Plasma was obtained from COVID<sub>stable</sub> (n=20), COVID<sub>ICU</sub> (n=20) and CAP<sub>ICU</sub> (n=15). IL-1 $\beta$ :IL-10 was significantly increased in COVID<sub>ICU</sub> (0.97 $\pm$ 0.39) compared to COVID<sub>stable</sub> (0.27 $\pm$ 0.12) and CAP<sub>ICU</sub> (0.37 $\pm$ 0.07), both P<0.0001).

### **Figure E2. Production of AAT by primary hepatocytes is increased in response to IL-6.**

(A) AAT qRT-PCR results of primary hepatocytes (HepG2 cell line) following exposure to human IL-6 (50pg/ml) for 48 h. AAT gene expression was significantly increased in the presence of IL-6 at both time points (n=3, P<0.05). (B) The level of AAT secreted from HepG2 cells at 48 h following treatment with IL-6 was increased 1.5-fold (n=3, P<0.05).

### **Figure E3. Individual trends in circulating levels of AAT and IL-6 over time in the COVID<sub>ICU</sub> cohort.**

(A) Circulating levels of AAT over time in ICU are displayed for the COVID<sub>ICU</sub> patients included in Fig. 3C. Patients who went on to good outcome are indicated in blue, while those who went on to poor outcome are in red. (B) Plasma IL-6 for the same individuals.

### **Figure E4. Individual IL-6:AAT ratio values over time in the COVID<sub>ICU</sub> cohort.**

The IL-6:AAT ratio for each patient in the COVID<sub>ICU</sub> group included in Fig. 3C at each time point is depicted. Patients who went on to good outcome are indicated in blue, while those who went on to poor outcome are indicated in red. We also investigated whether outcome would

associate with a worsening or improving IL-6:AAT ratio, if at all, taking good outcome and poor outcome as ordinal variables, and the slope of the IL-6:AAT ratio as a continuous variable, For each patient who experienced a bad outcome, their IL-6:AAT ratio worsened – a negative slope of ratio over time – while each patient who had a good outcome had a positive slope. The  $R^2$  value when Pearson's correlation was applied to the data set was 0.9.

**Table E1. Protease inhibitor cocktail constituents**

| <b>Protease inhibitor (1µl/ml)</b>        | <b>Description</b>                                     |
|-------------------------------------------|--------------------------------------------------------|
| Tosyl-L-lysyl-chloromethane hydrochloride | Serine protease inhibitor                              |
| Pepstatin A                               | Inhibitor of aspartyl proteases                        |
| Pefabloc                                  | Serine protease inhibitor                              |
| Ethylenediaminetetraacetic acid           | Metallopeptidase inhibitor                             |
| Leupeptin                                 | Inhibitor of cysteine, serine and threonine peptidases |
| Sodium fluoride                           | Phosphatase inhibitor                                  |
| Sodium orthovanadate                      | Phosphatase inhibitor                                  |
| Phenylmethylsulfonyl fluoride             | Serine protease inhibitor                              |

**Table E2. Details of key resources used.**

| <b>Reagent or resource</b>                | <b>Supplier/source</b>    | <b>Identifier</b>                                                                                                                                                                     |
|-------------------------------------------|---------------------------|---------------------------------------------------------------------------------------------------------------------------------------------------------------------------------------|
| <i>Antibodies</i>                         |                           |                                                                                                                                                                                       |
| PKM2                                      | Cell Signaling Technology | #3198                                                                                                                                                                                 |
| phospho-PKM2 (Tyr105)                     | Cell Signaling Technology | #3827                                                                                                                                                                                 |
| HIF-1 $\alpha$                            | Cell Signaling Technology | #36169                                                                                                                                                                                |
| $\beta$ -actin                            | Cell Signaling Technology | #4267                                                                                                                                                                                 |
| Lamin B1                                  | Cell Signaling Technology | #13435                                                                                                                                                                                |
| Anti-rabbit IgG (HRP-linked)              | Cell Signaling Technology | #7074                                                                                                                                                                                 |
| Anti-mouse IgG (HRP-linked)               | Cell Signaling Technology | #7076                                                                                                                                                                                 |
| <i>Critical Commercial Assays</i>         |                           |                                                                                                                                                                                       |
| IL-1 $\beta$ ELISA (sensitivity: 1 pg/ml) | R&D                       | #DLB50                                                                                                                                                                                |
| IL-6 ELISA (sensitivity: 0.7 pg/ml)       | R&D                       | #D6050                                                                                                                                                                                |
| IL-8 ELISA (sensitivity: 7.5 pg/ml)       | R&D                       | #D8000C                                                                                                                                                                               |
| IL-10 ELISA (sensitivity: 3.9 pg/ml)      | R&D                       | #D1000B                                                                                                                                                                               |
| sTNFR1 ELISA (sensitivity: 1.2 pg/ml)     | R&D                       | #DRT100                                                                                                                                                                               |
| Succinate assay                           | Abcam                     | #ab204718                                                                                                                                                                             |
| Lactate assay                             | Abcam                     | #ab65330                                                                                                                                                                              |
| Pyruvate assay                            | Abcam                     | #ab65342                                                                                                                                                                              |
| <i>Software and hardware</i>              |                           |                                                                                                                                                                                       |
| Graphpad Prism 8.0                        | www.graphpad.com          | sales@graphpad.com                                                                                                                                                                    |
| SpectraMax M3 plate reader                | Molecular Devices         | N/A                                                                                                                                                                                   |
| Chemi Doc MP System                       | Bio-Rad                   | #17001402                                                                                                                                                                             |
| Image Lab                                 | Bio-Rad                   | <a href="https://www.selectscience.net/products/image-lab-software-(170-9690)/?prodID=115956">https://www.selectscience.net/products/image-lab-software-(170-9690)/?prodID=115956</a> |
| Hydrasys electrophoresis platform         | Sebia                     | #PN1200                                                                                                                                                                               |
| <i>Other</i>                              |                           |                                                                                                                                                                                       |
| Nuclear extract kit                       | Active Motif              | #40010                                                                                                                                                                                |
| Hydragel 18 A1AT Isofocusing kit          | Sebia                     | #PN4357                                                                                                                                                                               |

**Table E3. Clinical features of the COVID<sub>ICU</sub> cohort at time of ICU admission**

| <b>Parameter</b>                                         | <b>Value</b>    |
|----------------------------------------------------------|-----------------|
| Temperature >38°C                                        | 8 (66)          |
| Heart rate >100 beats per minute                         | 7 (58)          |
| Respiratory rate >20 breaths per minute                  | 12 (100)        |
| SaO <sub>2</sub> <80% or requiring FiO <sub>2</sub> ≥60% | 11 (92)         |
| PaO <sub>2</sub>                                         | 7.15 +/- 1.41   |
| Acute confusion                                          | 3 (25)          |
| Mean arterial pressure                                   | 86.25 +/- 13.16 |
| qSOFA score                                              | 1.33 +/- 0.65   |
| PaO <sub>2</sub> :FiO <sub>2</sub> on arrival to ICU     | 157 +/- 67      |

*Data presented as absolute number (%) or mean +/- SD; FiO<sub>2</sub>: fraction of inspired oxygen; PaO<sub>2</sub>: partial pressure of arterial oxygen in kPa; mean arterial pressure and PaO<sub>2</sub>:FiO<sub>2</sub> in mmHg; qSOFA: quick sequential organ failure assessment.*

**Table E4. Clinical characteristics of the HC cohort**

|                        |                 |
|------------------------|-----------------|
| <b>Number</b>          | 15              |
| <b>Age in years</b>    | 39.24 +/- 13.16 |
| <b>Male/female</b>     | 9/6             |
| <b>Smoking history</b> |                 |
| Current                | 0 (0)           |
| Former                 | 2 (13)          |
| Never                  | 13 (87)         |
| <b>Vaping history</b>  |                 |
| Current                | 0 (0)           |
| Former                 | 0 (0)           |
| Never                  | 15 (100)        |

**Table E5. Clinical characteristics of the CAP<sub>ICU</sub> cohort**

|                                 |                 |
|---------------------------------|-----------------|
| <b>Number</b>                   | 15              |
| <b>Age in years</b>             | 59.66 +/- 17.82 |
| <b>Male/female</b>              | 9/6             |
| <b>Airway microbiology</b>      |                 |
| <i>Streptococcus pneumoniae</i> | 8 (53)          |
| <i>Haemophilus influenzae</i>   | 3 (20)          |
| <i>Staphylococcus aureus</i>    | 3 (20)          |
| <i>Pseudomonas aeruginosa</i>   | 1 (7)           |
| Positive respiratory viral swab | 5 (33)          |
| <b>Comorbidities</b>            |                 |
| Hypertension                    | 7 (47)          |
| Coronary artery disease         | 7 (47)          |
| Diabetes mellitus               | 2 (13)          |
| Obesity                         | 6 (40)          |
| Chronic lung disease            | 6 (40)          |
| Chronic kidney disease          | 6 (40)          |
| <b>Smoking history</b>          |                 |
| Current                         | 5 (33)          |
| Former                          | 7 (47)          |
| Never                           | 3 (20)          |
| <b>Vaping history</b>           |                 |
| Current                         | 1 (7)           |
| Former                          | 0 (0)           |
| Never                           | 14 (93)         |

Data presented as absolute number (%) or mean +/- SD; Some patients had more than one organism identified, therefore % totals for respiratory pathogens exceed 100%; Of those with *S. aureus*, two had recent influenza.

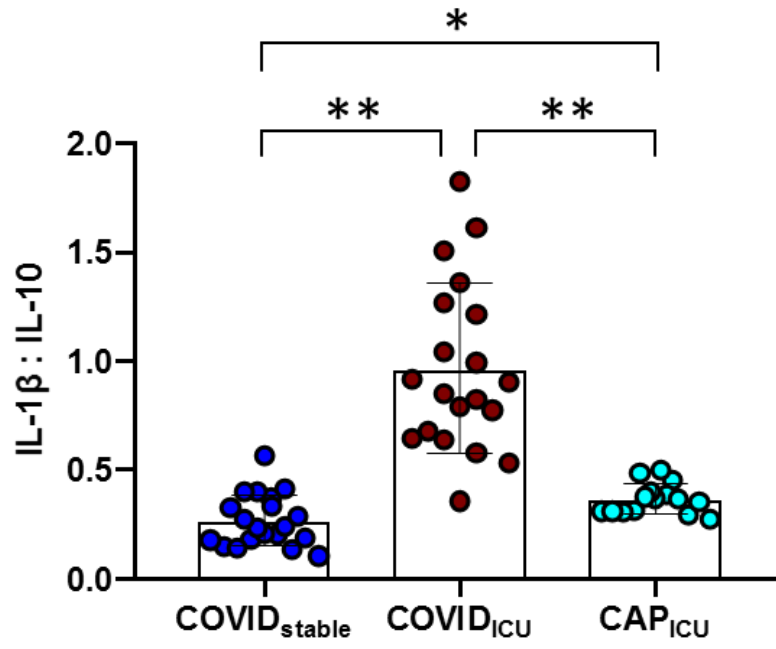

Figure E1.



**A**

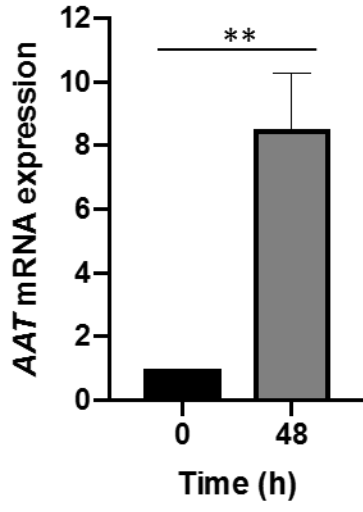

**B**

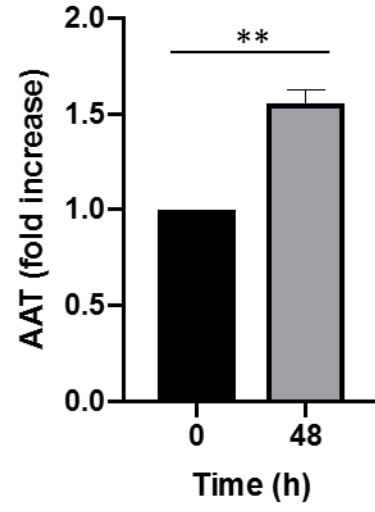

Figure E2.

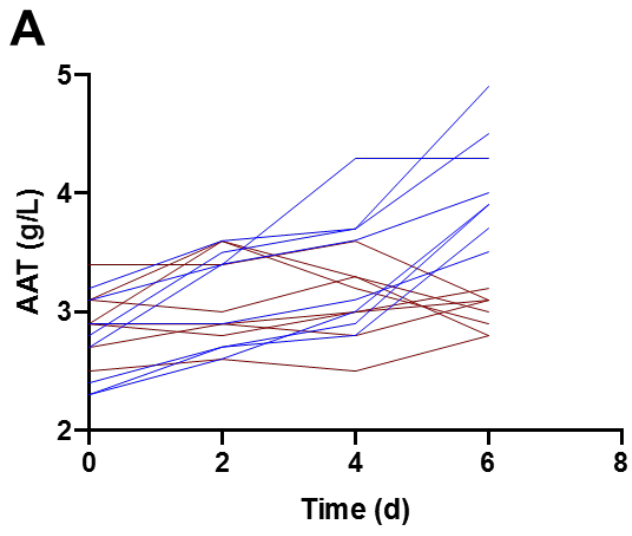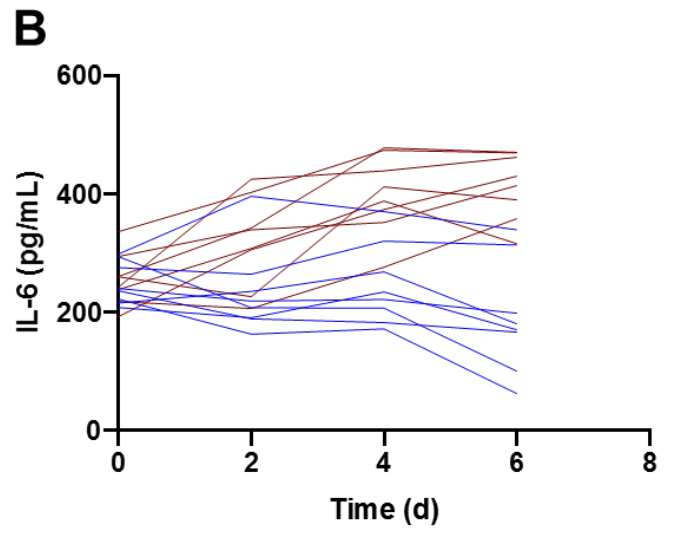

**Figure E3.**

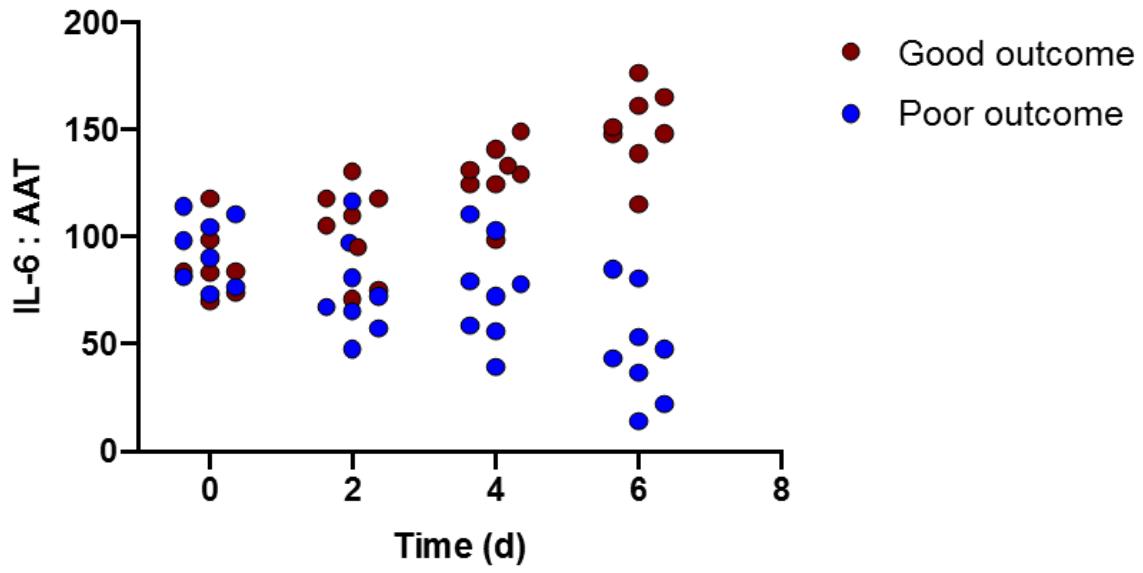

Figure E4.
